# Supplementary material for: Electroacupuncture Promotes Neuroplasticity of Central Auditory Pathway: An Auditory Evoked Potentials Study
Source: Hindawi journal article supplement (doi:10.1155/2022/6855775), 2022-11-21
Supplement: f1 [file 6855775.f1.pdf]

| I  | EA   |       |       |      |     |      | Control |       |       |       |       |       |
|----|------|-------|-------|------|-----|------|---------|-------|-------|-------|-------|-------|
|    | 0    | 0     | 0     | 0    | 0   | 0    | 0       | 0     | 0     | 0     | 0     |       |
| B  | 0    | 0     | 0     | 0    | 0   | 0    | 0       | 0     | 0     | 0     | 0     |       |
| D3 | 0.32 | 0.25  |       | 0.32 | 0.3 |      | 0.03    | -0.04 | -0.12 | 0     | -0.04 | -0.1  |
| D5 |      | -0.08 | 0.18  | 0.15 | 0   | 0.13 | -0.02   | 0.05  | -0.05 | -0.05 | 0.05  | -0.03 |
| D8 | 0.05 | -0.03 | -0.02 |      |     |      | -0.05   | -0.07 | -0.02 | 0     | -0.07 | -0.02 |

Compare each cell mean with the other cell mean in that row

Number of families 1  
Number of comparisons per family 4  
Alpha 0.05

Bonferroni's multiple comparisons test Mean Diff. 95.00% CI of diff. Below threshold? Summary Adjusted P Value

EA - Control

B 0  
D3 0.3425 0.2322 to 0.4528 Yes \*\* 0.0019  
D5 0.08433 -0.2140 to 0.3827 No ns >0.9999  
D8 0.0235 -0.3064 to 0.3534 No ns >0.9999

Test details Mean 1 Mean 2 Mean Diff. SE of diff. N1 N2 t DF

EA - Control

B 0 0 0 0 6 6  
D3 0.2975 -0.045 0.3425 0.02045 4 6 16.74 3  
D5 0.076 -0.008333 0.08433 0.06914 5 6 1.22 4  
D8 -0.0125 -0.036 0.0235 0.03724 4 5 0.6311 2

| III | EA   |      |       |      |       |      | Control |       |       |       |       |       |
|-----|------|------|-------|------|-------|------|---------|-------|-------|-------|-------|-------|
|     | 0    | 0    | 0     | 0    | 0     | 0    | 0       | 0     | 0     | 0     | 0     | 0     |
| B   | 0.75 | 0.69 |       | 0.68 | 0.75  |      | -0.33   | -0.07 | -0.1  | -0.33 | -0.07 | -0.08 |
| D3  |      | -0.2 | 0.67  | 0.45 | -0.18 | 0.63 | -0.55   | 0.1   | -0.02 | -0.58 | 0.08  | 0     |
| D5  | 0.23 | 0.09 | -0.08 |      |       |      | -0.12   | -0.55 | -0.07 | 0.38  | -0.48 | -0.09 |
| D8  |      |      |       |      |       |      |         |       |       |       |       |       |

Compare each cell mean with the other cell mean in that row

Number of families 1  
Number of comparisons per family 4  
Alpha 0.05

Bonferroni's multiple comparisons test Mean Diff. 95.00% CI of diff. Below threshold? Summary Adjusted P Value

EA - Control

B 0  
D3 0.8808 0.4926 to 1.269 Yes \*\* 0.0047  
D5 0.4357 -0.6884 to 1.560 No ns 0.6791  
D8 0.192 -2.419 to 2.803 No ns >0.9999

Test details Mean 1 Mean 2 Mean Diff. SE of diff. N1 N2 t DF

EA - Control

B 0 0 0 0 6 6  
D3 0.7175 -0.1633 0.8808 0.072 4 6 12.23 3  
D5 0.274 -0.1617 0.4357 0.2605 5 6 1.672 4  
D8 0.03 -0.162 0.192 0.2947 4 5 0.6516 2

| V  | EA   |      |      |      |      |      | Control |       |       |       |       |       |
|----|------|------|------|------|------|------|---------|-------|-------|-------|-------|-------|
|    | 0    | 0    | 0    | 0    | 0    | 0    | 0       | 0     | 0     | 0     | 0     | 0     |
| B  |      |      |      |      |      |      |         |       |       |       |       |       |
| D3 | 1.27 | 1.17 |      | 1.08 | 1.12 |      | -0.27   | -0.28 | -0.23 | -0.3  | 0.07  | -0.23 |
| D5 |      | 0.2  | 1.08 | 0.45 | 0.27 | 1.08 | -0.59   | -0.17 | -0.25 | -0.64 | -0.18 | -0.28 |
| D8 | 0.17 | -0.1 | 0.05 |      |      | 0.11 | -0.27   | -0.05 | 1.07  | -0.19 | 0.07  |       |

Compare each cell mean with the other cell mean in that row

Number of families 1  
Number of comparisons per family 4  
Alpha 0.05

Bonferroni's multiple comparisons test Mean Diff. 95.00% CI of diff. Below threshold? Summary Adjusted P Value

EA - Control

|    |         |                  |     |    |         |
|----|---------|------------------|-----|----|---------|
| B  | 0       |                  |     |    |         |
| D3 | 1.367   | 0.8399 to 1.893  | Yes | ** | 0.0032  |
| D5 | 0.9677  | 0.07910 to 1.856 | Yes | *  | 0.0373  |
| D8 | -0.0685 | -3.275 to 3.138  | No  | ns | >0.9999 |

Test details Mean 1 Mean 2 Mean Diff. SE of diff. N1 N2 t DF

EA - Control

|    |        |         |         |        |   |   |        |   |
|----|--------|---------|---------|--------|---|---|--------|---|
| B  | 0      | 0       | 0       | 0      | 6 | 6 |        |   |
| D3 | 1.16   | -0.2067 | 1.367   | 0.0977 | 4 | 6 | 13.99  | 3 |
| D5 | 0.616  | -0.3517 | 0.9677  | 0.2059 | 5 | 6 | 4.699  | 4 |
| D8 | 0.0575 | 0.126   | -0.0685 | 0.3619 | 4 | 5 | 0.1893 | 2 |

| I-III | EA   |       |       |      |       |       | Control |       |      |       |       |      |
|-------|------|-------|-------|------|-------|-------|---------|-------|------|-------|-------|------|
| B     | 0    | 0     | 0     | 0    | 0     | 0     | 0       | 0     | 0    | 0     | 0     | 0    |
| D3    | 0.43 | 0.44  |       | 0.36 | 0.45  |       | -0.36   | -0.03 | 0.02 | -0.33 | -0.03 | 0.02 |
| D5    |      | -0.12 | 0.49  | 0.3  | -0.18 | 0.5   | -0.53   | 0.05  | 0.03 | -0.53 | 0.03  | 0.03 |
| D8    | 0.18 | 0.12  | -0.06 |      |       | -0.07 | -0.48   | -0.05 | 0.38 | -0.41 | -0.07 |      |

Compare each cell mean with the other cell mean in that row

Number of families 1  
Number of comparisons per family 4  
Alpha 0.05

Bonferroni's multiple comparisons test Mean Diff. 95.00% CI of diff. Below threshold? Summary Adjusted P Value

EA - Control

B 0  
D3 0.5383 0.1017 to 0.9749 Yes \* 0.0277  
D5 0.3513 -0.4962 to 1.199 No ns 0.5928  
D8 0.1685 -2.156 to 2.493 No ns >0.9999

Test details Mean 1 Mean 2 Mean Diff. SE of diff. N1 N2 t DF

EA - Control

B 0 0 0 0 6 6  
D3 0.42 -0.1183 0.5383 0.08097 4 6 6.648 3  
D5 0.198 -0.1533 0.3513 0.1964 5 6 1.789 4  
D8 0.0425 -0.126 0.1685 0.2624 4 5 0.6422 2

| III-V | EA    |       |      |            |      |      | Control |       |       |       |       |       |
|-------|-------|-------|------|------------|------|------|---------|-------|-------|-------|-------|-------|
|       | 0     | 0     | 0    | 0          | 0    | 0    | 0       | 0     | 0     | 0     | 0     | 0     |
| B     |       |       |      |            |      |      |         |       |       |       |       |       |
| D3    | 0.52  | 0.48  |      | 0.4        | 0.37 |      | 0.06    | -0.21 | -0.13 | 0.03  | 0.14  | -0.15 |
| D5    |       | 0.4   | 0.41 | 4.4409E-16 | 0.45 | 0.45 | -0.04   | -0.27 | -0.23 | -0.06 | -0.26 | -0.28 |
| D8    | -0.06 | -0.19 | 0.13 |            |      | 0.23 | 0.28    | 0.02  | 0.69  | 0.29  | 0.16  |       |

Compare each cell mean with the other cell mean in that row

Number of families 1  
Number of comparisons per family 4  
Alpha 0.05

Bonferroni's multiple comparisons test Mean Diff. 95.00% CI of diff. Below threshold? Summary Adjusted P Value

EA - Control

|    |         |                     |     |    |        |
|----|---------|---------------------|-----|----|--------|
| B  | 0       |                     |     |    |        |
| D3 | 0.4858  | -0.008877 to 0.9805 | No  | ns | 0.0526 |
| D5 | 0.532   | 0.005905 to 1.058   | Yes | *  | 0.0481 |
| D8 | -0.2605 | -1.194 to 0.6725    | No  | ns | 0.5274 |

Test details

Mean 1 Mean 2 Mean Diff. SE of diff. N1 N2 t DF

EA - Control

|    |        |          |         |         |   |   |       |   |
|----|--------|----------|---------|---------|---|---|-------|---|
| B  | 0      | 0        | 0       | 0       | 6 | 6 |       |   |
| D3 | 0.4425 | -0.04333 | 0.4858  | 0.09175 | 4 | 6 | 5.295 | 3 |
| D5 | 0.342  | -0.19    | 0.532   | 0.1219  | 5 | 6 | 4.363 | 4 |
| D8 | 0.0275 | 0.288    | -0.2605 | 0.1053  | 4 | 5 | 2.474 | 2 |

| I-V | EA   |       |      |      |      |      | Control |       |       |       |       |       |
|-----|------|-------|------|------|------|------|---------|-------|-------|-------|-------|-------|
| B   | 0    | 0     | 0    | 0    | 0    | 0    | 0       | 0     | 0     | 0     | 0     | 0     |
| D3  | 0.95 | 0.92  |      | 0.76 | 0.82 |      | -0.3    | -0.24 | -0.11 | -0.3  | 0.11  | -0.13 |
| D5  |      | 0.28  | 0.9  | 0.3  | 0.27 | 0.95 | -0.57   | -0.22 | -0.2  | -0.59 | -0.23 | -0.25 |
| D8  | 0.12 | -0.07 | 0.07 |      |      | 0.16 | -0.2    | -0.03 | 1.07  | -0.12 | 0.09  |       |

Compare each cell mean with the other cell mean in that row

Number of families 1  
Number of comparisons per family 4  
Alpha 0.05

Bonferroni's multiple comparisons test Mean Diff. 95.00% CI of diff. Below threshold? Summary Adjusted P Value

EA - Control

|    |        |                 |     |    |  |         |
|----|--------|-----------------|-----|----|--|---------|
| B  | 0      |                 |     |    |  |         |
| D3 | 1.024  | 0.4393 to 1.609 | Yes | *  |  | 0.0101  |
| D5 | 0.8833 | 0.2698 to 1.497 | Yes | *  |  | 0.0137  |
| D8 | -0.092 | -3.059 to 2.875 | No  | ns |  | >0.9999 |

Test details

Mean 1 Mean 2 Mean Diff. SE of diff. N1 N2 t DF

EA - Control

|    |        |         |        |        |   |   |        |   |
|----|--------|---------|--------|--------|---|---|--------|---|
| B  | 0      | 0       | 0      | 0      | 6 | 6 |        |   |
| D3 | 0.8625 | -0.1617 | 1.024  | 0.1085 | 4 | 6 | 9.442  | 3 |
| D5 | 0.54   | -0.3433 | 0.8833 | 0.1422 | 5 | 6 | 6.212  | 4 |
| D8 | 0.07   | 0.162   | -0.092 | 0.3349 | 4 | 5 | 0.2747 | 2 |

| P0 | EA  |      |      |     |     |      |     |     |      | Control |      |      |      |      |      |     |      |      |   |
|----|-----|------|------|-----|-----|------|-----|-----|------|---------|------|------|------|------|------|-----|------|------|---|
| B  | 0   | 0    | 0    | 0   | 0   | 0    | 0   | 0   | 0    | 0       | 0    | 0    | 0    | 0    | 0    | 0   | 0    | 0    | 0 |
| D3 | 3.8 | 5.8  | 2.6  | 4.8 | 9.4 | 2.2  | 3.6 | 5   | -1.6 | 0.6     | -2   | -2.2 | -3.2 | -1.8 | -0.8 | 1   | -0.6 | -1.6 |   |
| D5 | 2.6 | 3    | 3.2  | 3.8 | 4.2 | 2    | 0.2 | 2.6 | -1.8 | 0       | -0.4 | -1.2 | 2    | -1.6 | -0.6 | 0.4 | -0.2 | -1.2 |   |
| D8 | 0.4 | -1.2 | -1.4 | 1.2 | 2.4 | -0.8 | 0   | 0.8 | -4.4 | 2.2     | 1.6  | 2    | -0.4 | 0    | 1.2  | 0   | -1   | 1.4  |   |

Compare each cell mean with the other cell mean in that row

Number of families 1  
Number of comparisons per family 4  
Alpha 0.05

Bonferroni's multiple comparisons test Mean Diff. 95.00% CI of diff. Below threshold? Summary Adjusted P Value

EA - Control

|    |        |                 |     |    |        |
|----|--------|-----------------|-----|----|--------|
| B  | 0      |                 |     |    |        |
| D3 | 5.133  | 1.895 to 8.372  | Yes | ** | 0.0024 |
| D5 | 2.511  | 0.4036 to 4.619 | Yes | *  | 0.0173 |
| D8 | -1.111 | -3.296 to 1.074 | No  | ns | 0.6576 |

Test details Mean 1 Mean 2 Mean Diff. SE of diff. N1 N2 t DF

EA - Control

|    |         |         |        |        |   |   |       |       |
|----|---------|---------|--------|--------|---|---|-------|-------|
| B  | 0       | 0       | 0      | 0      | 9 | 9 |       |       |
| D3 | 3.956   | -1.178  | 5.133  | 1.09   | 9 | 9 | 4.71  | 11.2  |
| D5 | 2.2     | -0.3111 | 2.511  | 0.725  | 9 | 9 | 3.463 | 12.71 |
| D8 | -0.3333 | 0.7778  | -1.111 | 0.7538 | 9 | 9 | 1.474 | 12.94 |

| Na | EA   |      |     |      |     |      |     |     |      | Control |      |      |     |     |     |      |      |      |   |
|----|------|------|-----|------|-----|------|-----|-----|------|---------|------|------|-----|-----|-----|------|------|------|---|
| B  | 0    | 0    | 0   | 0    | 0   | 0    | 0   | 0   | 0    | 0       | 0    | 0    | 0   | 0   | 0   | 0    | 0    | 0    | 0 |
| D3 | -2.4 | 5.6  | 2.8 | 1.2  | 6.8 | 0    | 2.4 | 5.2 | 0.8  | -0.2    | -2.2 | -2.2 | 1.2 | 0.6 | 0.6 | 0.4  | -2.2 | -1   |   |
| D5 | -3.2 | 1.4  | 2.4 | -1.8 | 4.8 | -0.6 | 0   | 2.4 | -4.2 | 1.4     | 0    | -1.4 | 2   | 0.8 | 0.4 | 0.8  | -0.6 | -1.4 |   |
| D8 | -0.8 | -1.6 | 0.2 | 0    | 3   | -1.6 | -2  | 0.2 | -3.8 | 2       | 2.4  | 0.4  | 1.4 | 1.8 | 5   | -0.4 | -0.6 | 1.8  |   |

Compare each cell mean with the other cell mean in that row

Number of families 1  
Number of comparisons per family 4  
Alpha 0.05

Bonferroni's multiple comparisons test Mean Diff. 95.00% CI of diff. Below threshold? Summary Adjusted P Value

EA - Control

|    |          |                  |    |    |         |
|----|----------|------------------|----|----|---------|
| B  | 0        |                  |    |    |         |
| D3 | 3.044    | -0.1871 to 6.276 | No | ns | 0.0682  |
| D5 | -0.08889 | -3.236 to 3.059  | No | ns | >0.9999 |
| D8 | -2.244   | -4.626 to 0.1375 | No | ns | 0.0697  |

Test details Mean 1 Mean 2 Mean Diff. SE of diff. N1 N2 t DF

EA - Control

|    |         |         |          |        |   |   |         |       |
|----|---------|---------|----------|--------|---|---|---------|-------|
| B  | 0       | 0       | 0        | 0      | 9 | 9 |         |       |
| D3 | 2.489   | -0.5556 | 3.044    | 1.089  | 9 | 9 | 2.795   | 11.28 |
| D5 | 0.1333  | 0.2222  | -0.08889 | 1.048  | 9 | 9 | 0.08482 | 10.58 |
| D8 | -0.7111 | 1.533   | -2.244   | 0.8453 | 9 | 9 | 2.655   | 15.78 |



| Pa | EA   |      |      |      |     |      |      |      |       | Control |      |      |      |      |      |      |      |     |   |
|----|------|------|------|------|-----|------|------|------|-------|---------|------|------|------|------|------|------|------|-----|---|
| B  | 0    | 0    | 0    | 0    | 0   | 0    | 0    | 0    | 0     | 0       | 0    | 0    | 0    | 0    | 0    | 0    | 0    | 0   | 0 |
| D3 | -5.8 | -2.6 | -7.6 | -2.2 | 4.6 | -3.6 | -1.2 | 12.2 | -3.6  | 4.6     | -10  | -4.8 | -2   | -6.8 | -4.8 | -6.8 | -6.4 | 1   |   |
| D5 | -8   | 5    | -8.6 | -6   | 7   | -7.4 | -4   | 1.8  | -12.4 | 1.8     | -5.4 | 8.4  | -8.6 | 0.4  | -2.4 | -6.8 | 2    | 9.2 |   |
| D8 | -9.8 | -9.4 | -10  | -1.4 | 1   | -0.8 | -9.6 | 7.6  | -13.8 | -7.2    | -1   | 0.6  | 0.8  | 1.2  | 0.2  | 3    | 5.6  | 8.6 |   |

Compare each cell mean with the other cell mean in that row

Number of families 1  
Number of comparisons per family 4  
Alpha 0.05

Bonferroni's multiple comparisons test Mean Diff. 95.00% CI of diff. Below threshold? Summary Adjusted P Value

EA - Control

B 0  
D3 2.911 -4.204 to 10.03 No ns >0.9999  
D5 -3.467 -12.08 to 5.151 No ns >0.9999  
D8 -6.444 -14.37 to 1.484 No ns 0.1407

Test details Mean 1 Mean 2 Mean Diff. SE of diff. N1 N2 t DF

EA - Control

B 0 0 0 0 9 9  
D3 -1.089 -4 2.911 2.504 9 9 1.163 14.81  
D5 -3.622 -0.1556 -3.467 3.062 9 9 1.132 15.94  
D8 -5.133 1.311 -6.444 2.752 9 9 2.342 13.46

| Nb | EA    |       |       |       |      |       |       |       |       | Control |     |      |       |      |       |      |      |      |
|----|-------|-------|-------|-------|------|-------|-------|-------|-------|---------|-----|------|-------|------|-------|------|------|------|
|    | 0     | 0     | 0     | 0     | 0    | 0     | 0     | 0     | 0     | 0       | 0   | 0    | 0     | 0    | 0     | 0    | 0    | 0    |
| B  | 0     | 0     | 0     | 0     | 0    | 0     | 0     | 0     | 0     | 0       | 0   | 0    | 0     | 0    | 0     | 0    | 0    | 0    |
| D3 | -6.8  | -11.4 | -1    | -8.4  | -2   | -5.2  | -7.2  | 3     | 1.8   | -9.4    | -13 | 1.4  | 4.6   | -2   | -5.2  | -1.8 | -8.8 | 7.2  |
| D5 | -8.2  | 1.4   | -14.4 | -9.2  | -8.2 | -19   | -7    | -13.8 | -18.2 | -11.6   | -11 | 11   | -12.4 | 2.6  | -11.4 | 0.6  | 0.4  | 13   |
| D8 | -12.6 | -15.8 | -19.6 | -11.4 | -7.4 | -16.4 | -12.4 | -6.2  | -18.8 | -23.8   | -11 | -6.4 | 0     | -3.8 | -14.2 | 4.2  | -3   | 13.4 |

Compare each cell mean with the other cell mean in that row

Number of families 1  
Number of comparisons per family 4  
Alpha 0.05

Bonferroni's multiple comparisons test Mean Diff. 95.00% CI of diff. Below threshold? Summary Adjusted P Value

EA - Control

|    |                        |    |    |         |  |
|----|------------------------|----|----|---------|--|
| B  | 0                      |    |    |         |  |
| D3 | -1.133 -9.021 to 6.754 | No | ns | >0.9999 |  |
| D5 | -8.644 -19.99 to 2.706 | No | ns | 0.1857  |  |
| D8 | -8.444 -20.14 to 3.252 | No | ns | 0.2174  |  |

Test details Mean 1 Mean 2 Mean Diff. SE of diff. N1 N2 t DF

EA - Control

|    |        |        |        |       |   |   |        |       |
|----|--------|--------|--------|-------|---|---|--------|-------|
| B  | 0      | 0      | 0      | 0     | 9 | 9 |        |       |
| D3 | -4.133 | -3     | -1.133 | 2.769 | 9 | 9 | 0.4093 | 14.56 |
| D5 | -10.73 | -2.089 | -8.644 | 3.945 | 9 | 9 | 2.191  | 13.57 |
| D8 | -13.4  | -4.956 | -8.444 | 3.918 | 9 | 9 | 2.155  | 10.92 |

| Pb | EA    |       |       |       |       |      |      |       |       |       | Control |       |      |      |       |      |       |     |   |
|----|-------|-------|-------|-------|-------|------|------|-------|-------|-------|---------|-------|------|------|-------|------|-------|-----|---|
| B  | 0     | 0     | 0     | 0     | 0     | 0    | 0    | 0     | 0     | 0     | 0       | 0     | 0    | 0    | 0     | 0    | 0     | 0   | 0 |
| D3 | -16   | -8.6  | 1.6   | -8.6  | -4.2  | -3.4 | -5.8 | 0.8   | 5.6   | -14.6 | -22.4   | -5.2  | -3.2 | -6.2 | -7.2  | -3.2 | -15.8 | 5.8 |   |
| D5 | -14.8 | -1    | -14.4 | -10.6 | -13.4 | -10  | -2.4 | 0.8   | -9    | -12.2 | -17.6   | -1.2  | -7   | -1.6 | -11.4 | 0.6  | -16.4 | 6.8 |   |
| D8 | -18.8 | -15.4 | -13.6 | -8.4  | -12.4 | -17  | -7   | -13.4 | -21.2 | -26   | -23.2   | -18.8 | 0.4  | -1.8 | -16.4 | -1.6 | -19   |     |   |

Compare each cell mean with the other cell mean in that row

Number of families 1  
 Number of comparisons per family 4  
 Alpha 0.05

Bonferroni's multiple comparisons test Mean Diff. 95.00% CI of diff. Below threshold? Summary Adjusted P Value

EA - Control

B 0  
 D3 3.711 -6.289 to 13.71 No ns >0.9999  
 D5 -1.644 -11.39 to 8.103 No ns >0.9999  
 D8 -0.8333 -13.35 to 11.68 No ns >0.9999

Test details Mean 1 Mean 2 Mean Diff. SE of diff. N1 N2 t DF

EA - Control

B 0 0 0 0 9 9  
 D3 -4.289 -8 3.711 3.527 9 9 1.052 15.06  
 D5 -8.311 -6.667 -1.644 3.42 9 9 0.4808 14.49  
 D8 -14.13 -13.3 -0.8333 4.053 9 8 0.2056 9.304
